# Supplementary material for: Association of Dietary Patterns with Weight Status and Metabolic Risk Factors among Children and Adolescents
Source: PubMed Central journal article supplement (PMC8065894; doi:10.3390/nu13041153), 2021-03-31
Supplement: nutrients-13-01153-s001.pdf [file nutrients-13-01153-s001.pdf]

**Table S1. Food groupings for Korean children and adolescents**

|    | Foods or food groups    | Food items                                                                                                                                                                                       |
|----|-------------------------|--------------------------------------------------------------------------------------------------------------------------------------------------------------------------------------------------|
| 1  | White rice              | Steamed rice, rice congee                                                                                                                                                                        |
| 2  | Whole grain & others    | Grains, acorn jelly (called dotori-muk ), corn, Korean multigrain shakes (misugaru latte)                                                                                                        |
| 3  | Snack & cereals         | Snack, cookies, cake, pudding, popcorn, chocolate, ice cream, candy, sweet jelly of red beans cereals                                                                                            |
| 4  | Flour & rice cakes      | Bread, dumpling, tortilla, sandwiches, soup, pie, rice cake, tteokbokki (spicy rice cake)                                                                                                        |
| 5  | Instant ramen           | Instant ramen                                                                                                                                                                                    |
| 6  | Noodles                 | Noodle in black bean sauce (jajangmyeon), pasta, Korean knife cut noodle soup (kalguksu)                                                                                                         |
| 7  | Potatoes                | Sweet potato, potato, potato salad, starch from potatoes                                                                                                                                         |
| 8  | Sugars                  | Sugar, jam, syrup, honey, starch syrup                                                                                                                                                           |
| 9  | Soup                    | Korean soybean paste soup (doenjang guk) , Kimchi soup, squid soup (ojingeo-guk) , Korean seaweed soup (miyeok guk) , spicy beef soup with vegetables (yukgaejang)                               |
| 10 | Legumes                 | Beans Soy bean paste, tofu, fried tofu, tofu residue                                                                                                                                             |
| 11 | Nuts                    | Sesame, perilla, walnut, almond, pine nut, sunflower seed                                                                                                                                        |
| 12 | Vegetable & mushrooms   | Cucumber, paprika, lettuce, spinach, cabbage, radish, carrot, onion, broccoli, mushroom                                                                                                          |
| 13 | Kimchi                  | Kimchi, kkakdugi (cubed radish kimchi)                                                                                                                                                           |
| 14 | Fruit                   | Fruit, canned fruit                                                                                                                                                                              |
| 15 | Meat & fish             | Pork, pork belly, pork intestines, beef, beef ribs, beef intestines, chicken, duck meat, turkey, Sushi, largehead hairtail, eel, larimichthys polyactis , alaska pollock, mackerel, tuna, salmon |
| 16 | Eggs                    | Eggs                                                                                                                                                                                             |
| 17 | Seaweed                 | Seaweed, kelp                                                                                                                                                                                    |
| 18 | Milk and dairy products | Milk, yogurt, cheese                                                                                                                                                                             |
| 19 | Vegetable oil           | Sesame oil, perilla oil, soybean oil                                                                                                                                                             |
| 20 | Carbonated beverages    | Coke, sprite                                                                                                                                                                                     |
| 21 | Other drinks            | Sweet drinks, fruit juice, Green tea, red ginseng tea, soy bean milk                                                                                                                             |
| 22 | Seasonings              | Salt, black pepper, soy sauce, dressing, curry, red pepper paste, ketchup, mayonnaise                                                                                                            |
| 23 | Fast food               | Burger, French fries, fried chicken, fried chicken with sauce, pizza                                                                                                                             |
| 24 | Processed food          | Ham, sausage, bacon, pork cutlet, fish cutlet, fish cake                                                                                                                                         |
| 25 | Fermented salty foods   | Fermented seafood, pickled vegetable                                                                                                                                                             |

Note: General food groupings were based on similarities between foods and nutrient composition.
